# Supplementary material
Source: HighWire-hosted journal article supplement (https://gut.bmj.com/content/69/1/146)
Supplement: inline-supplementary-material-6 [file inline-supplementary-material-6.pdf]

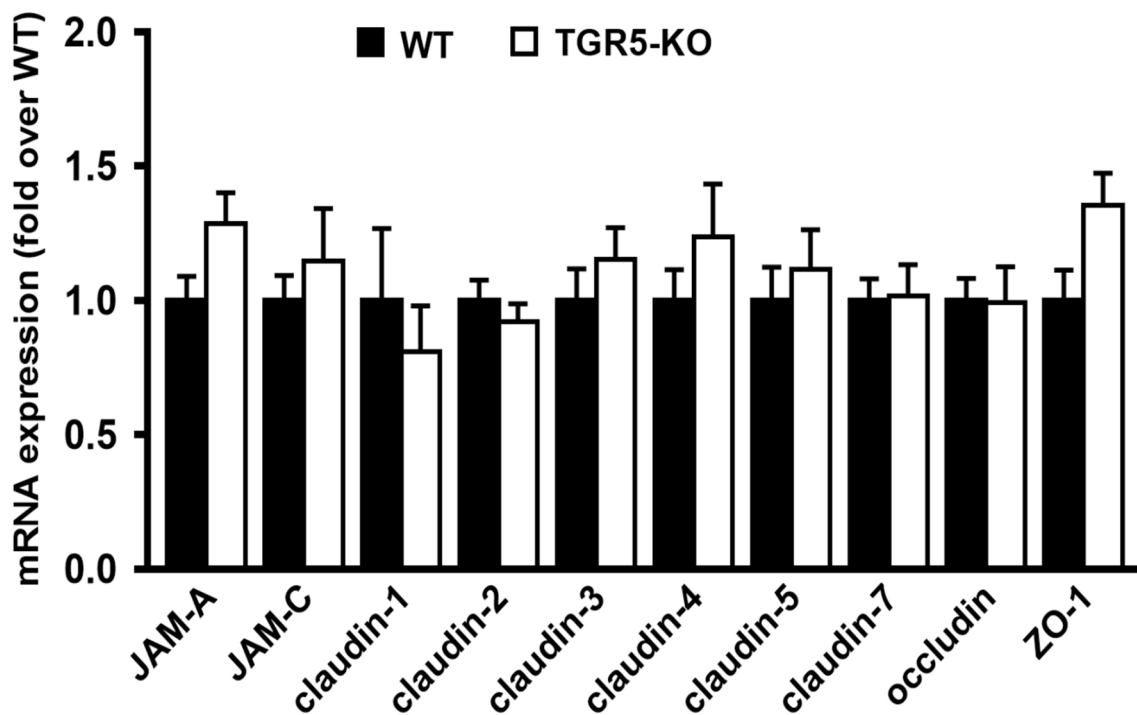

Supplementary Figure 4A

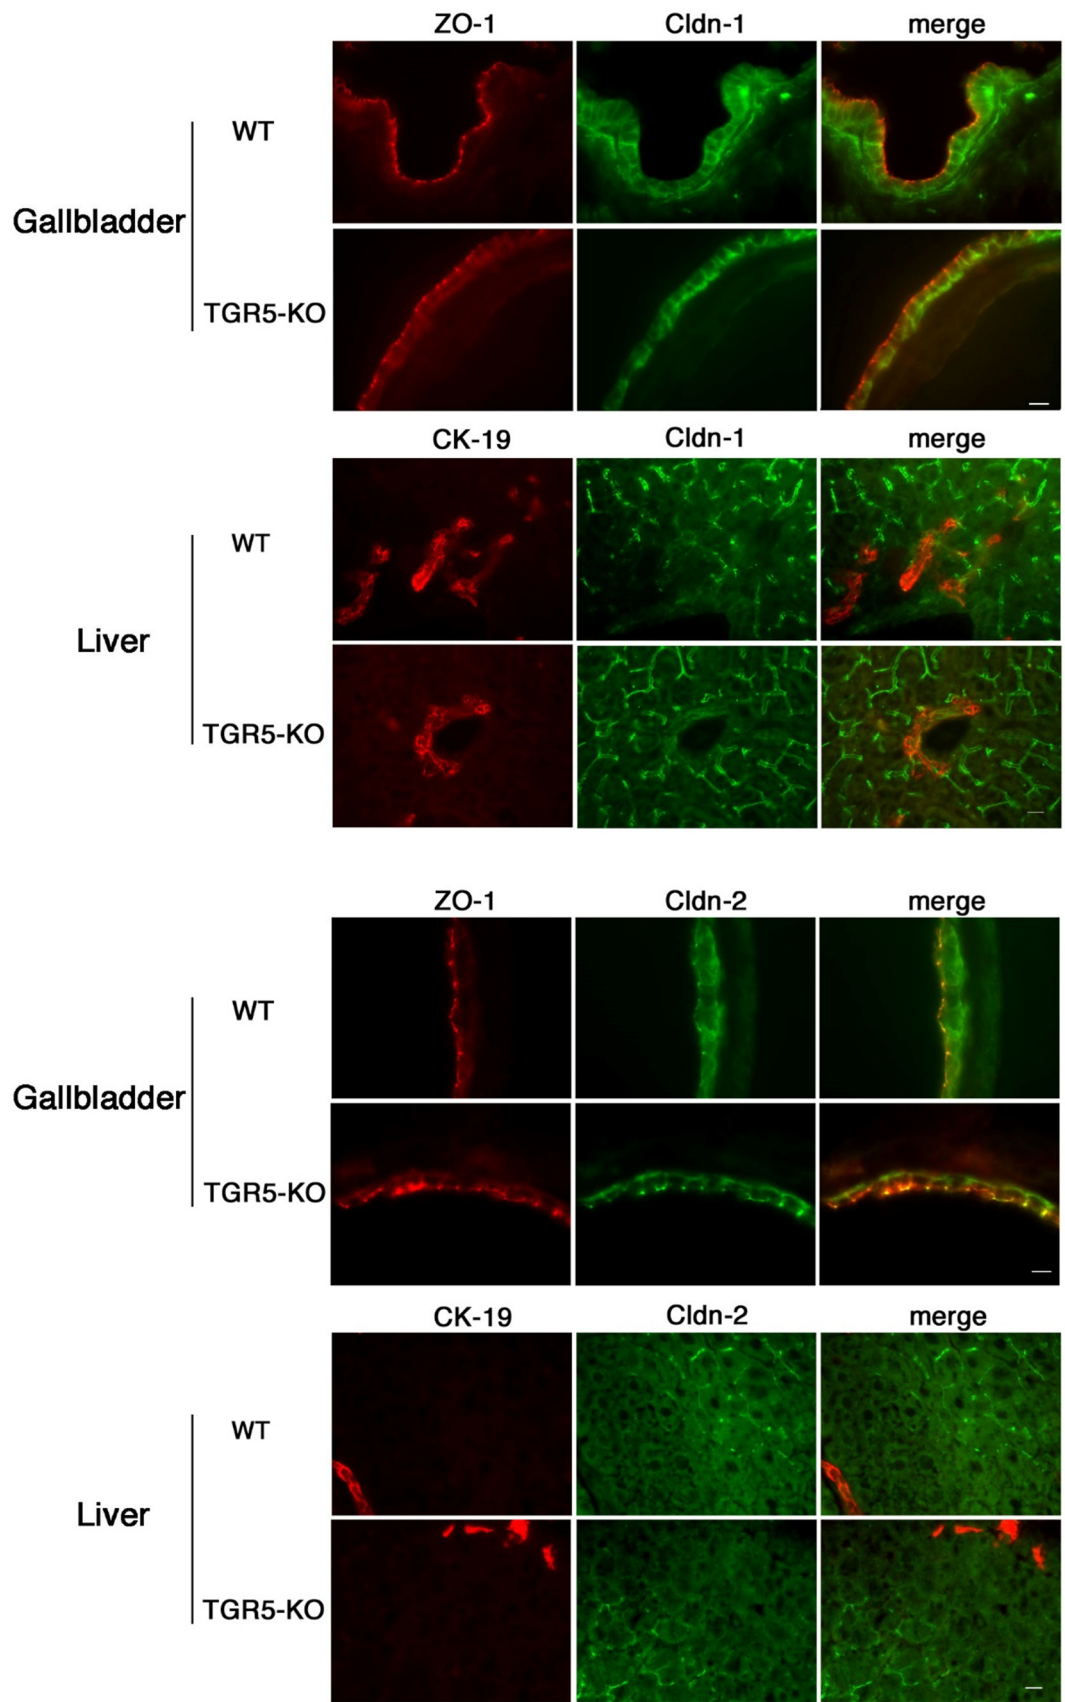

Supplementary Figure 4B

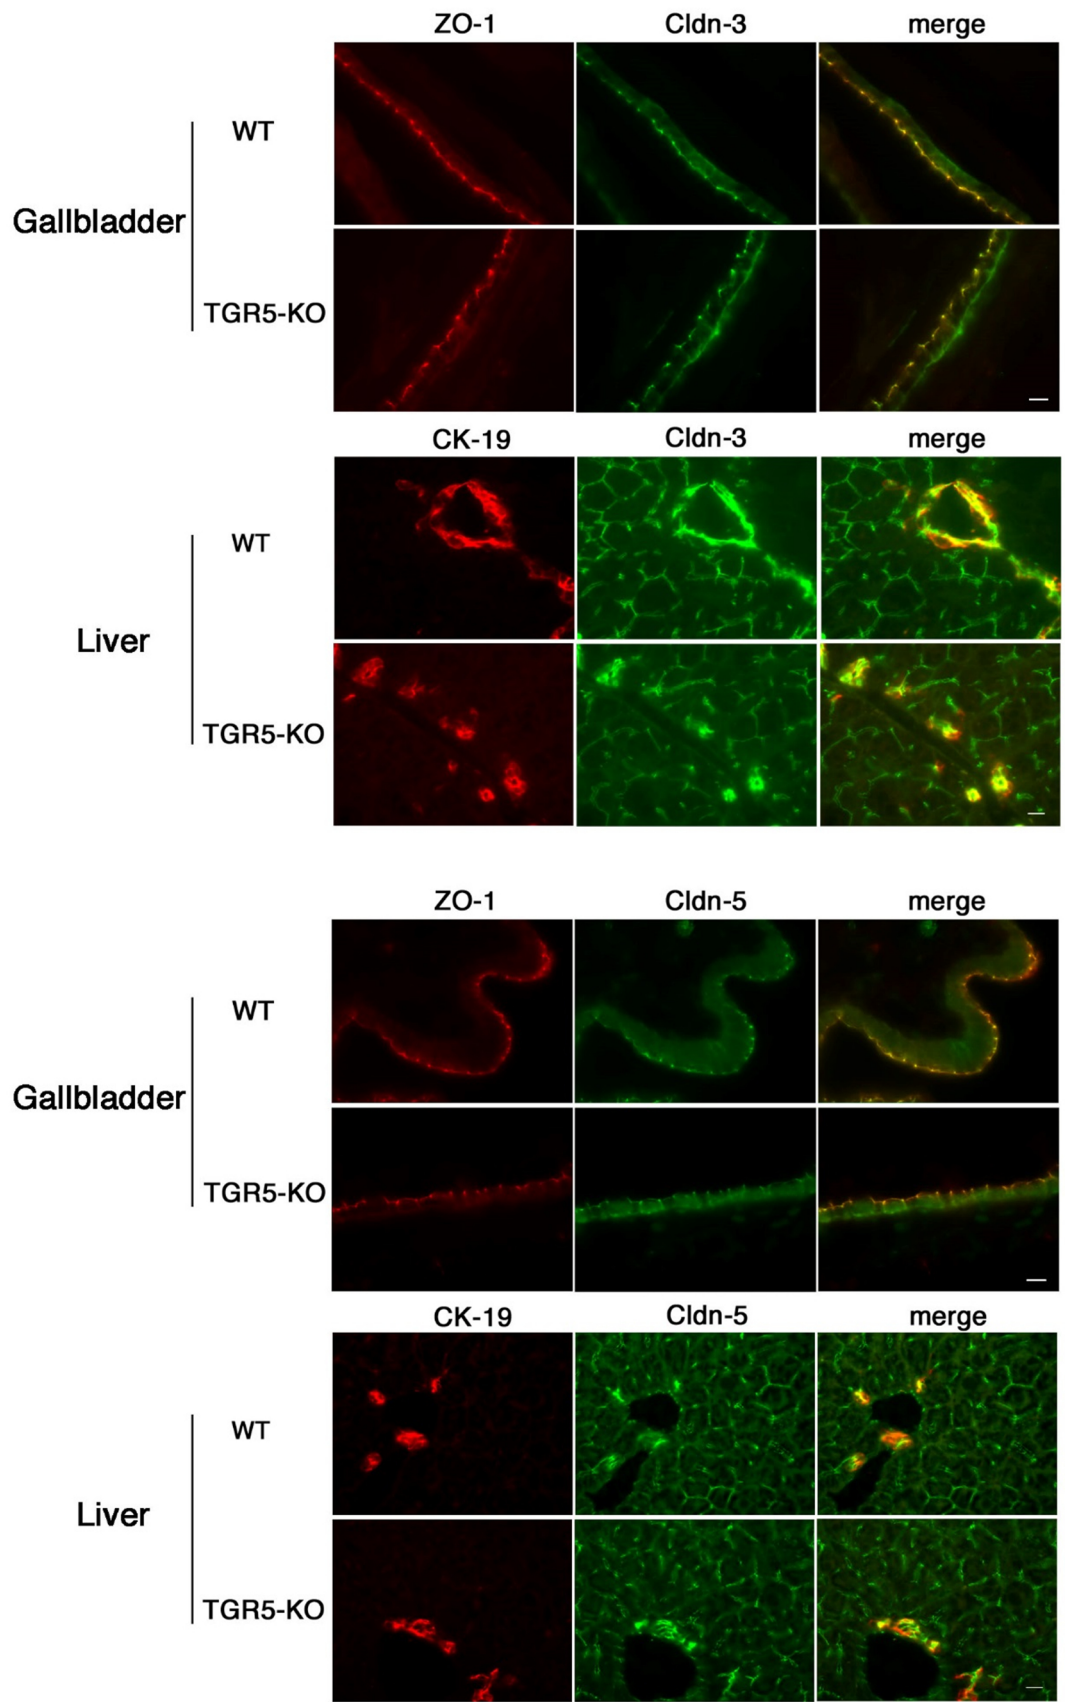

Supplementary Figure 4C

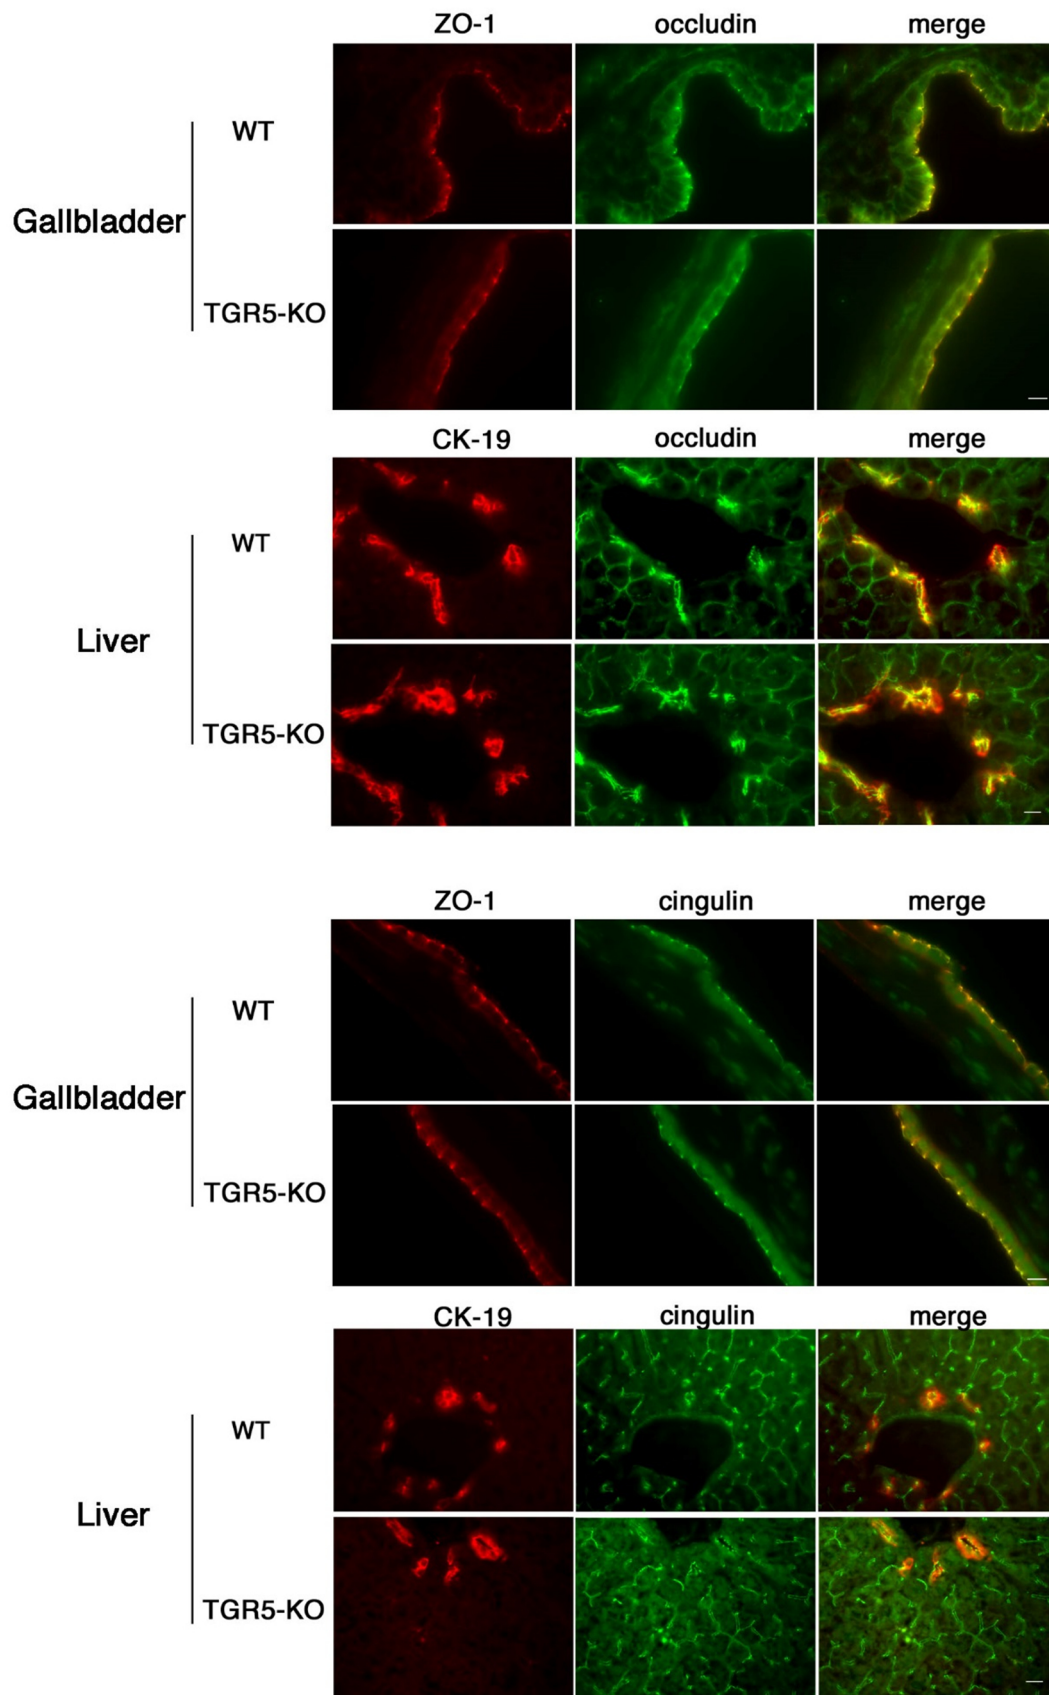

Supplementary Figure 4D



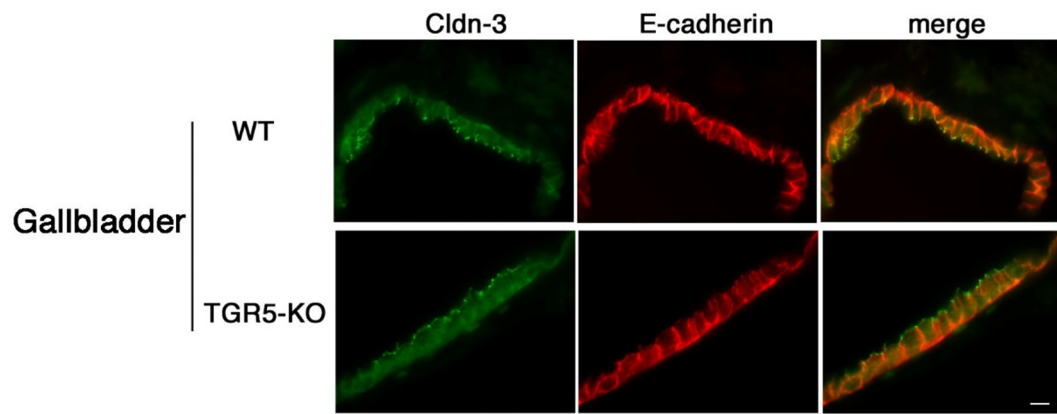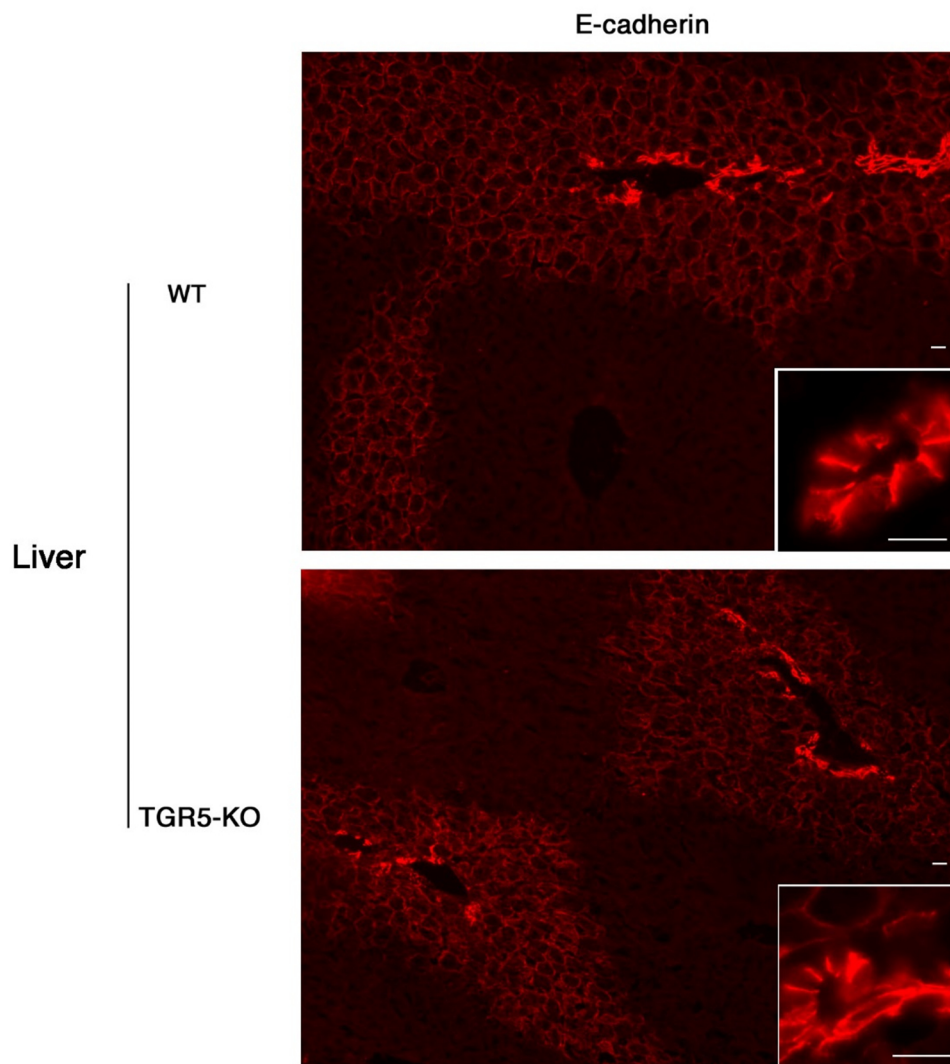

Supplementary Figure 4E

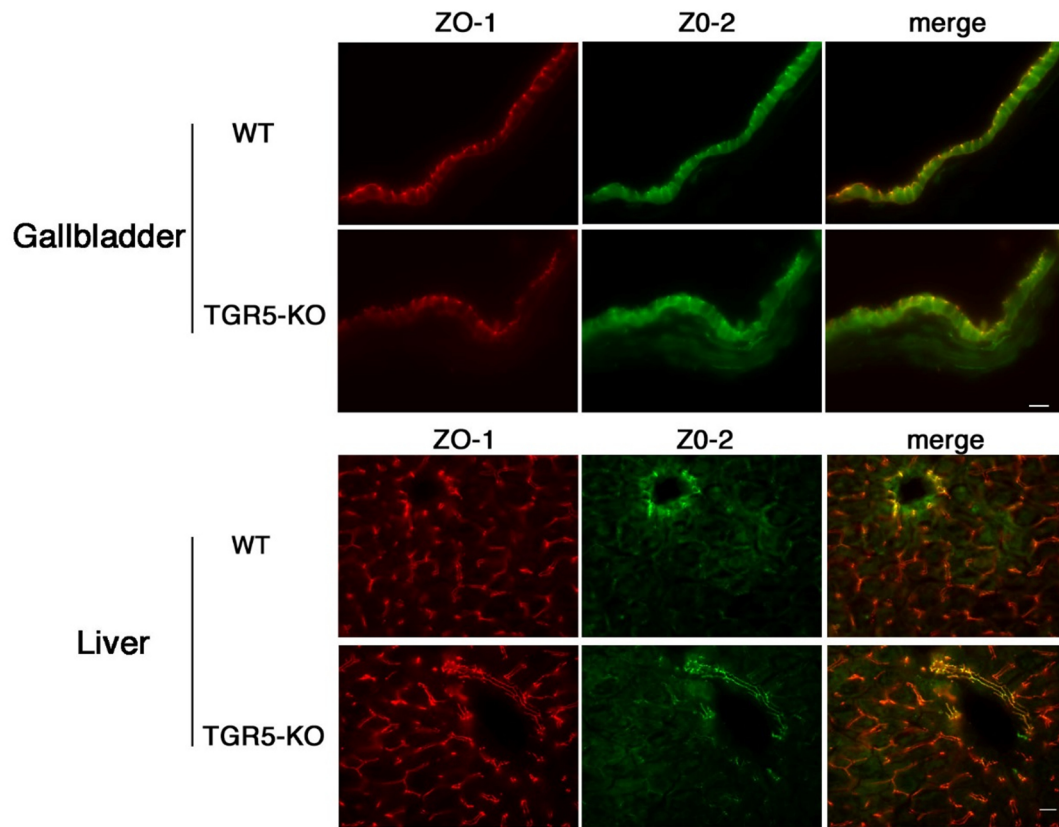

Supplementary Figure 4F
