# Supplementary material
Source: HighWire-hosted journal article supplement (https://gut.bmj.com/content/69/1/146)

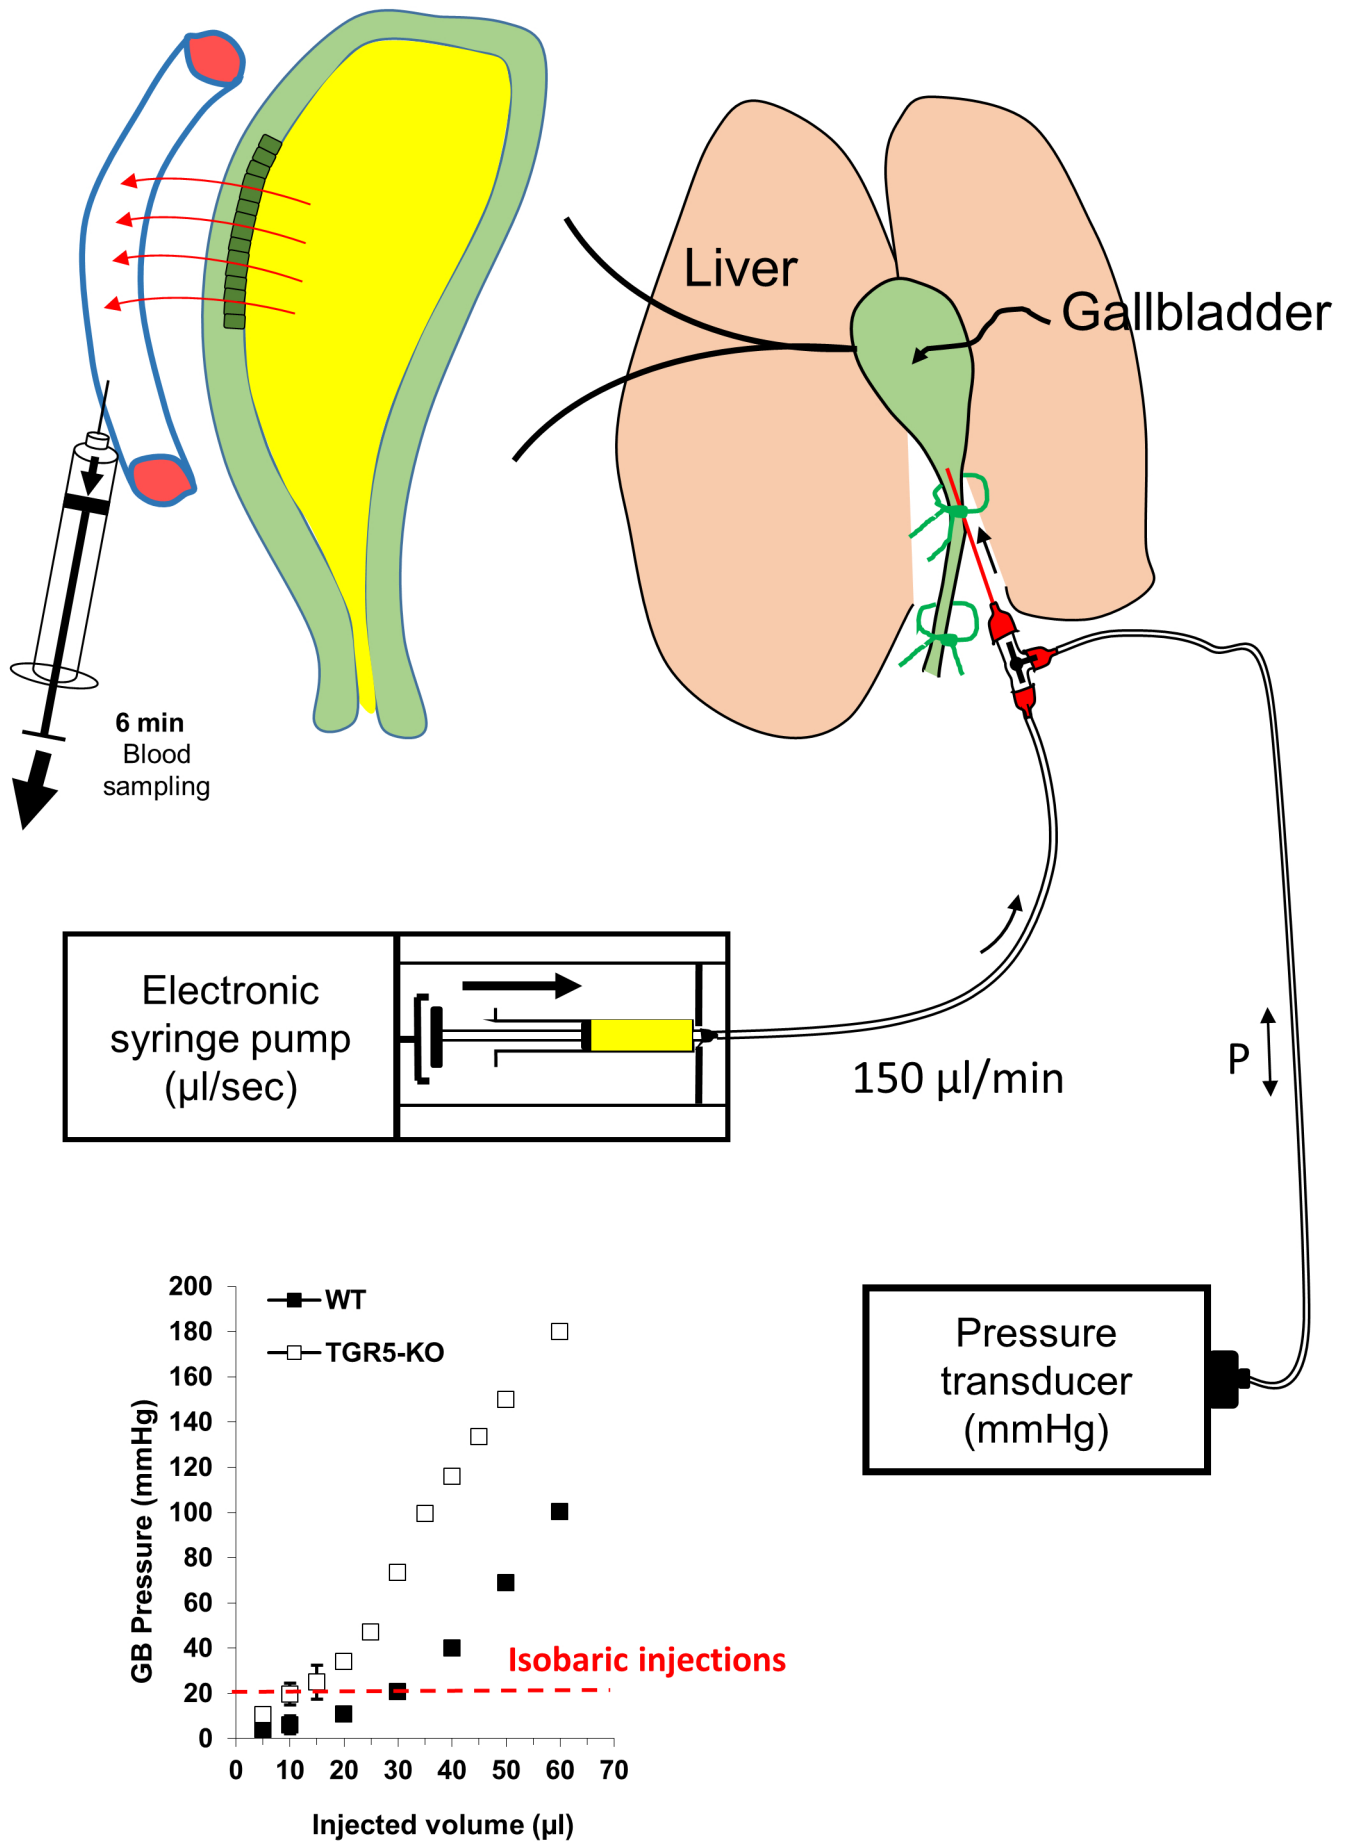

Supplementary Figure 1

Supplement: inline-supplementary-material-1 [file inline-supplementary-material-1.pdf]

## A NRC cells

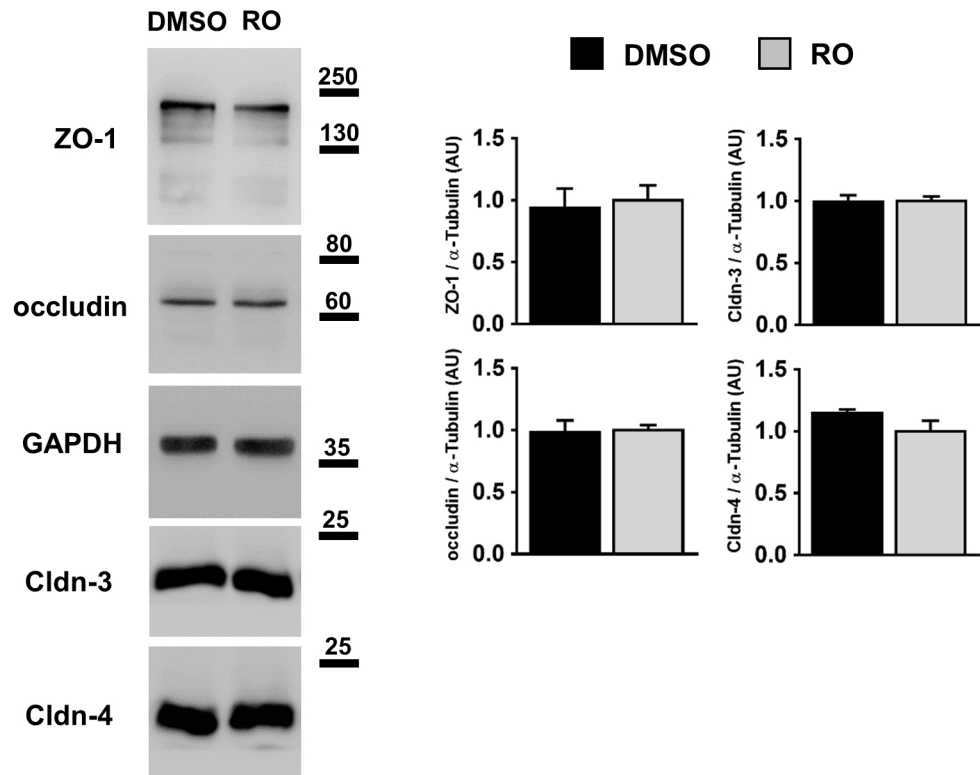

## B MDCK II Tet-off cells

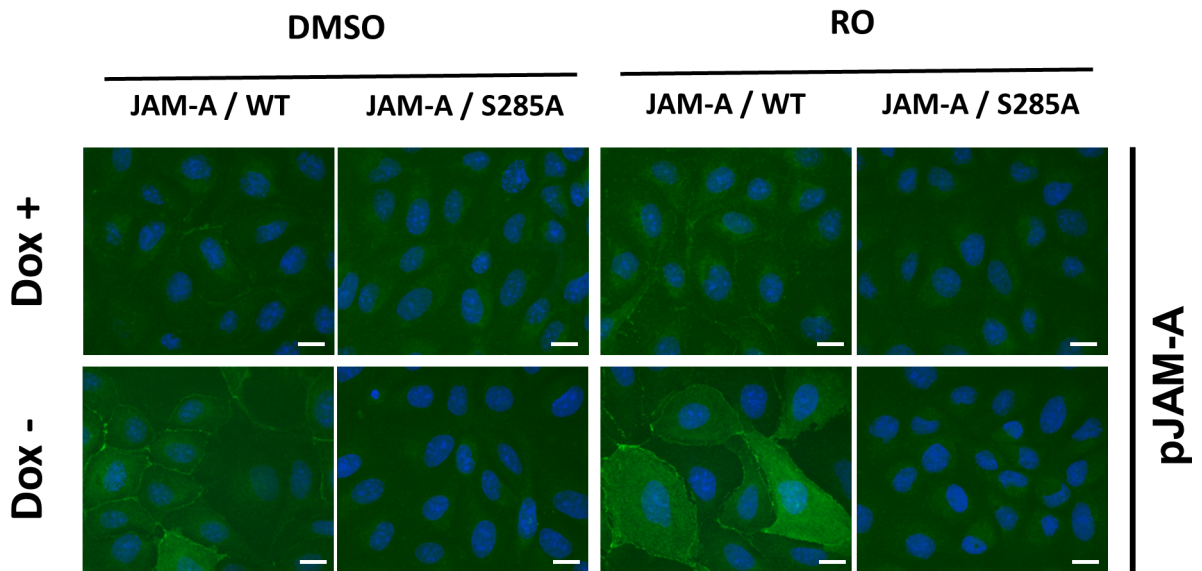

Supplement: inline-supplementary-material-10 [file inline-supplementary-material-10.pdf]

**A**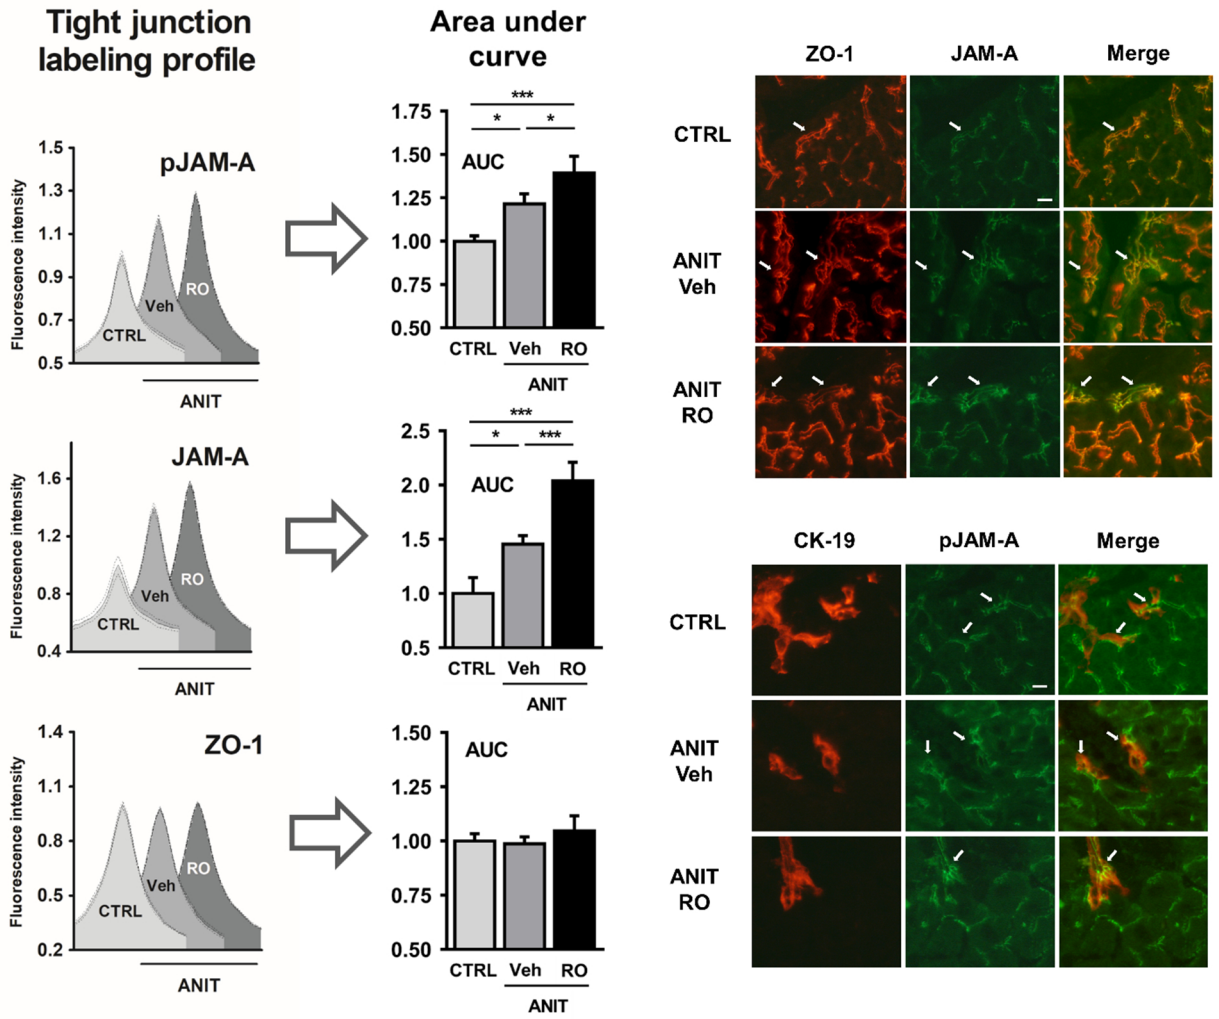**B**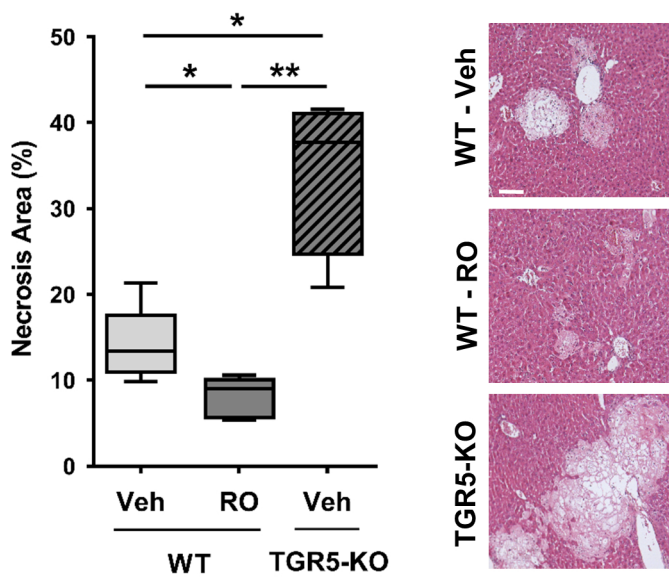

Supplementary Figure 10

Supplement: inline-supplementary-material-11 [file inline-supplementary-material-11.pdf]

**A**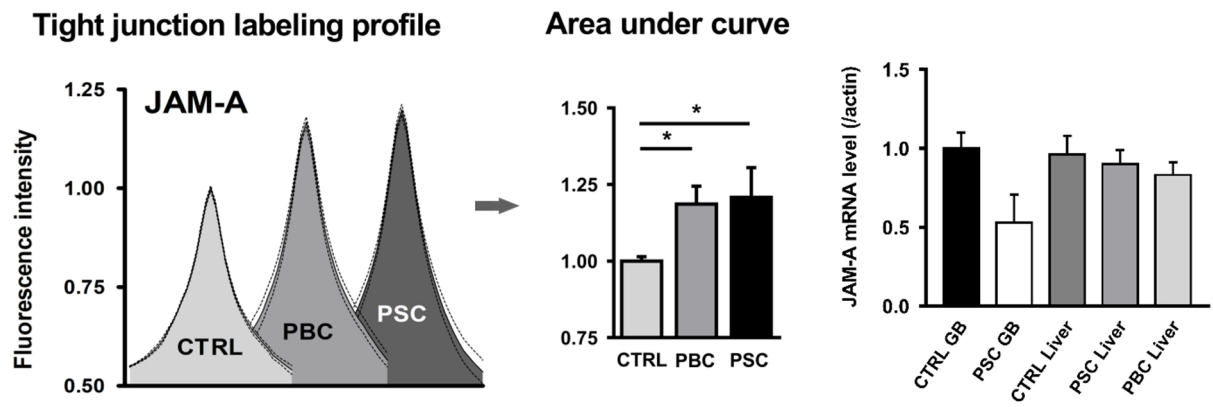**B**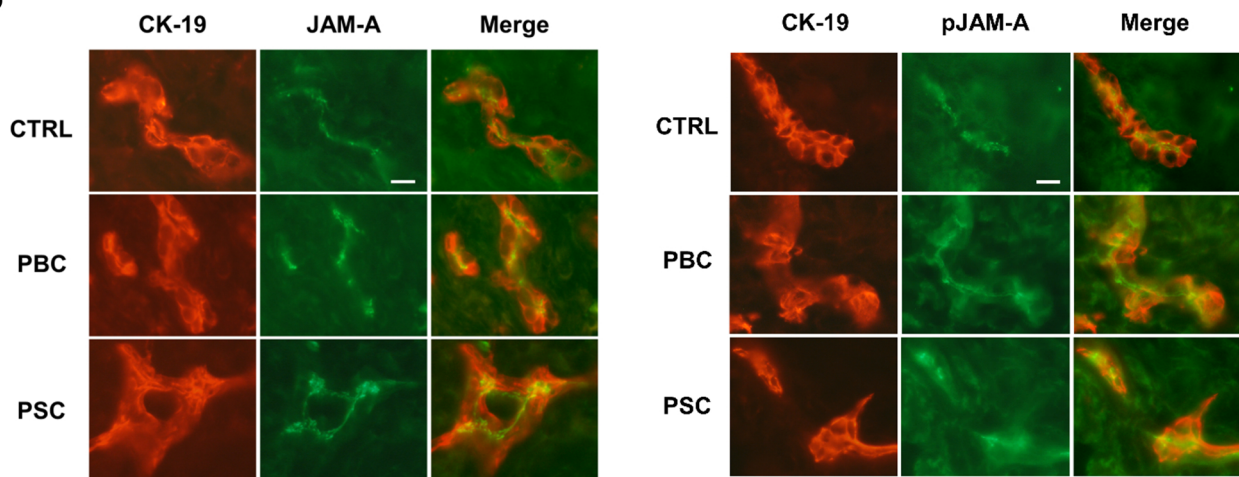**C**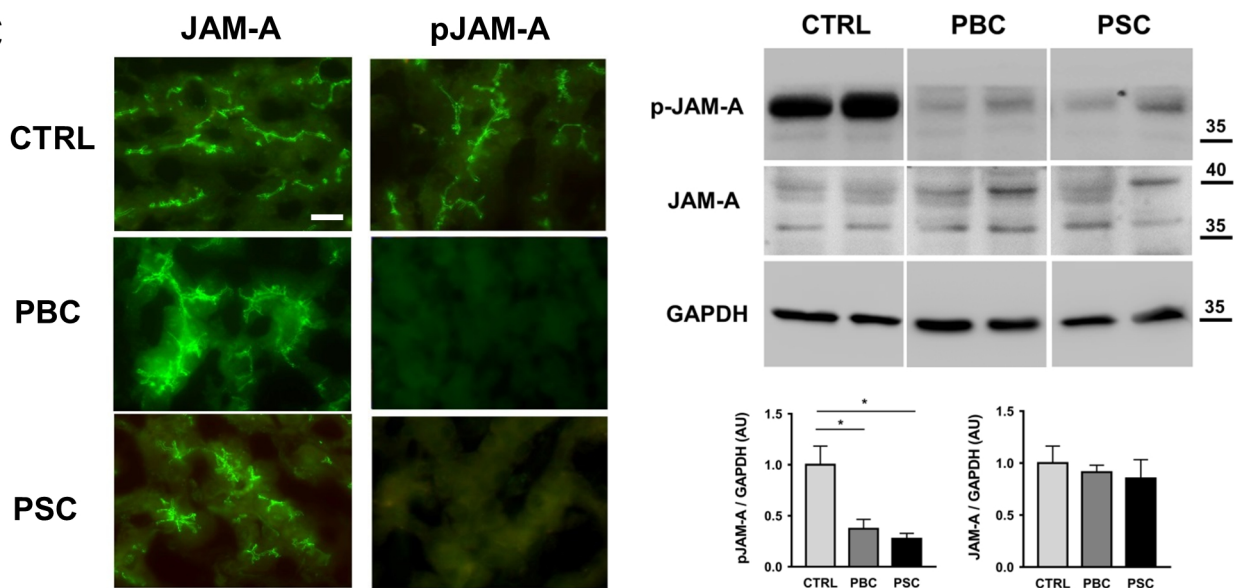

Supplementary Figure 11

Supplement: inline-supplementary-material-12 [file inline-supplementary-material-12.pdf]

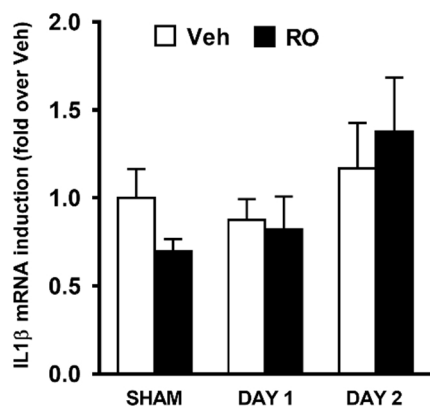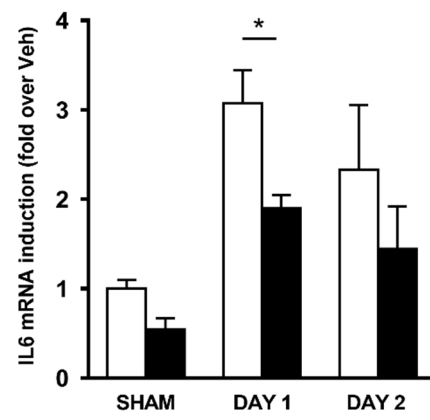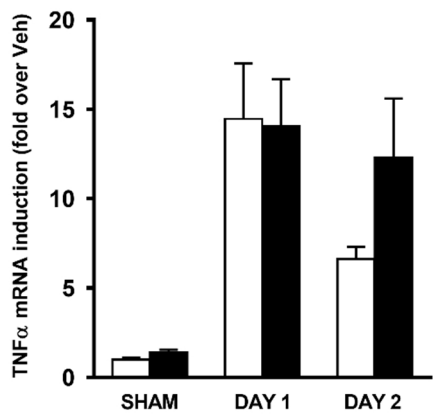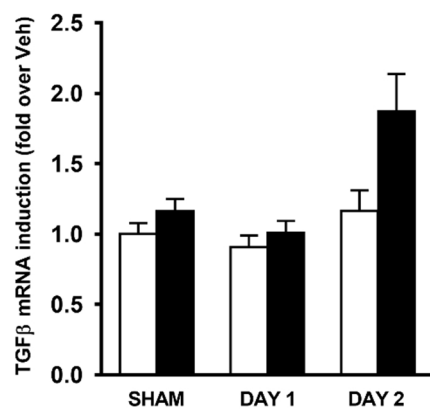

Supplementary Figure 12

Supplement: inline-supplementary-material-13 [file inline-supplementary-material-13.pdf]

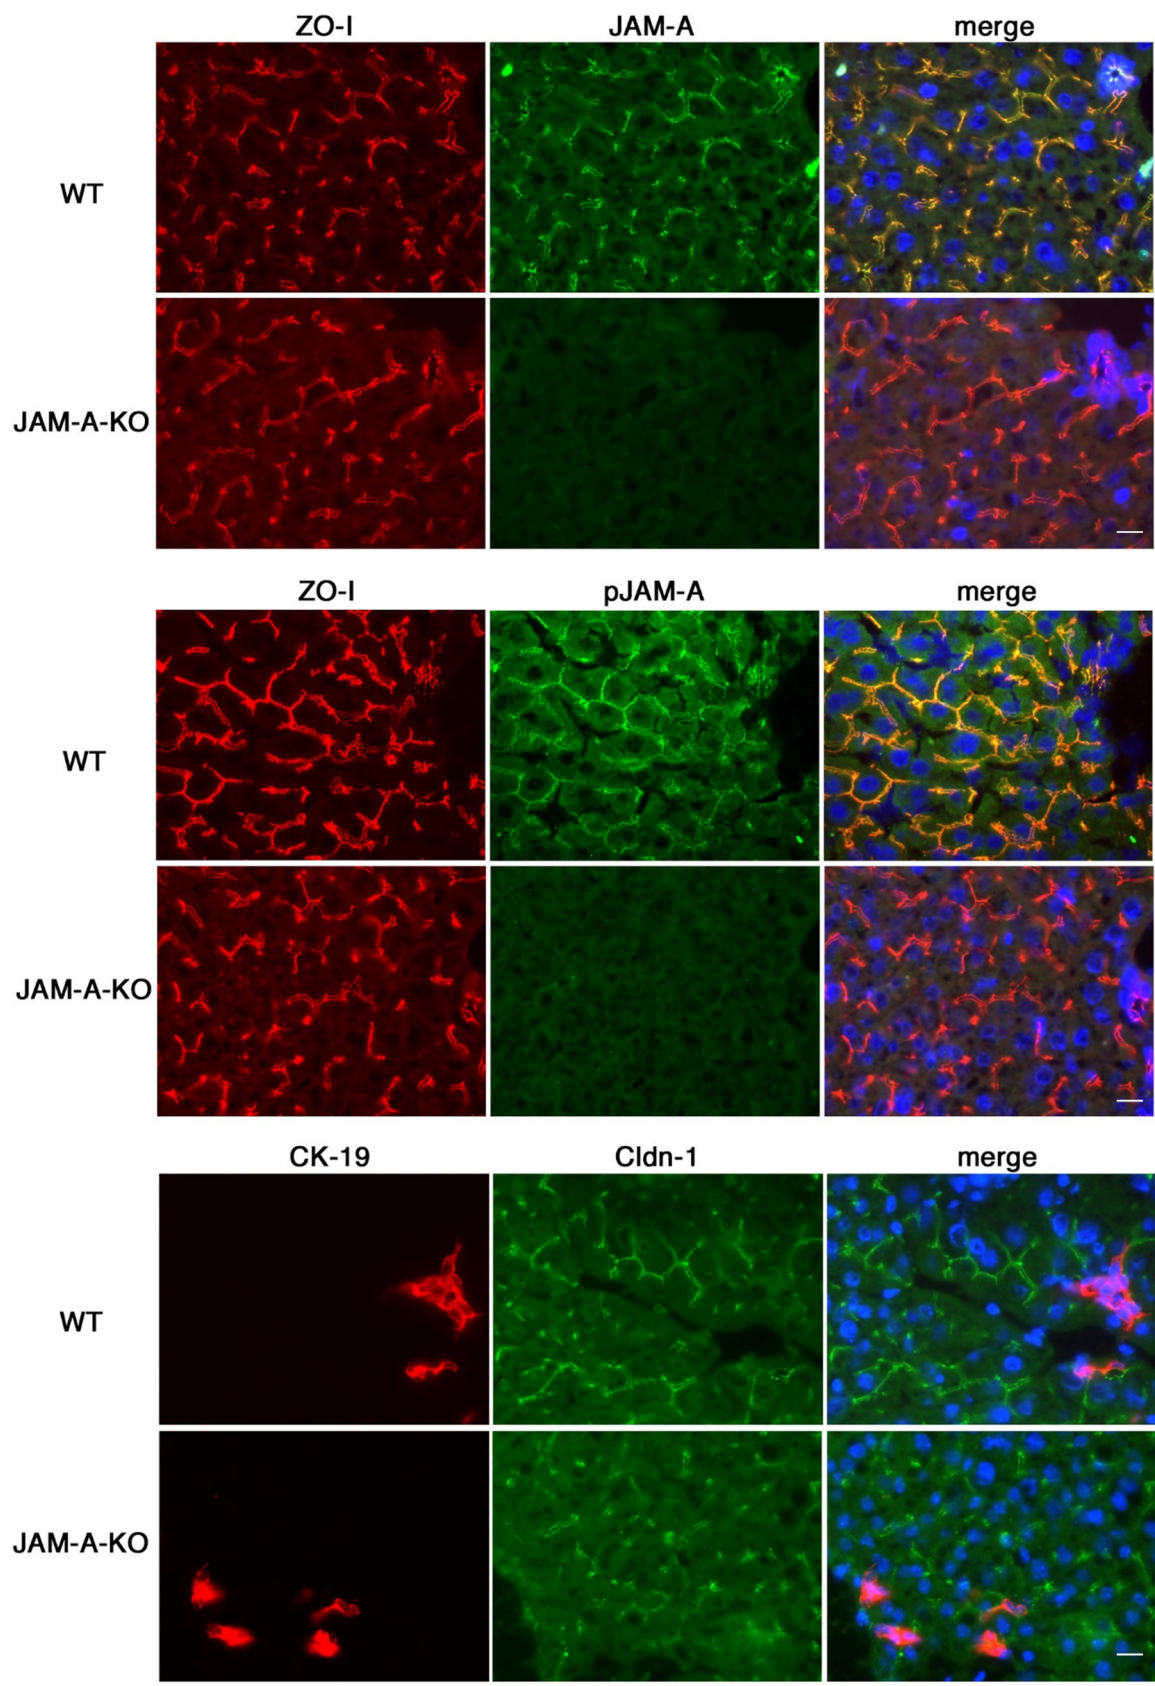

**Supplementary Figure 13A**

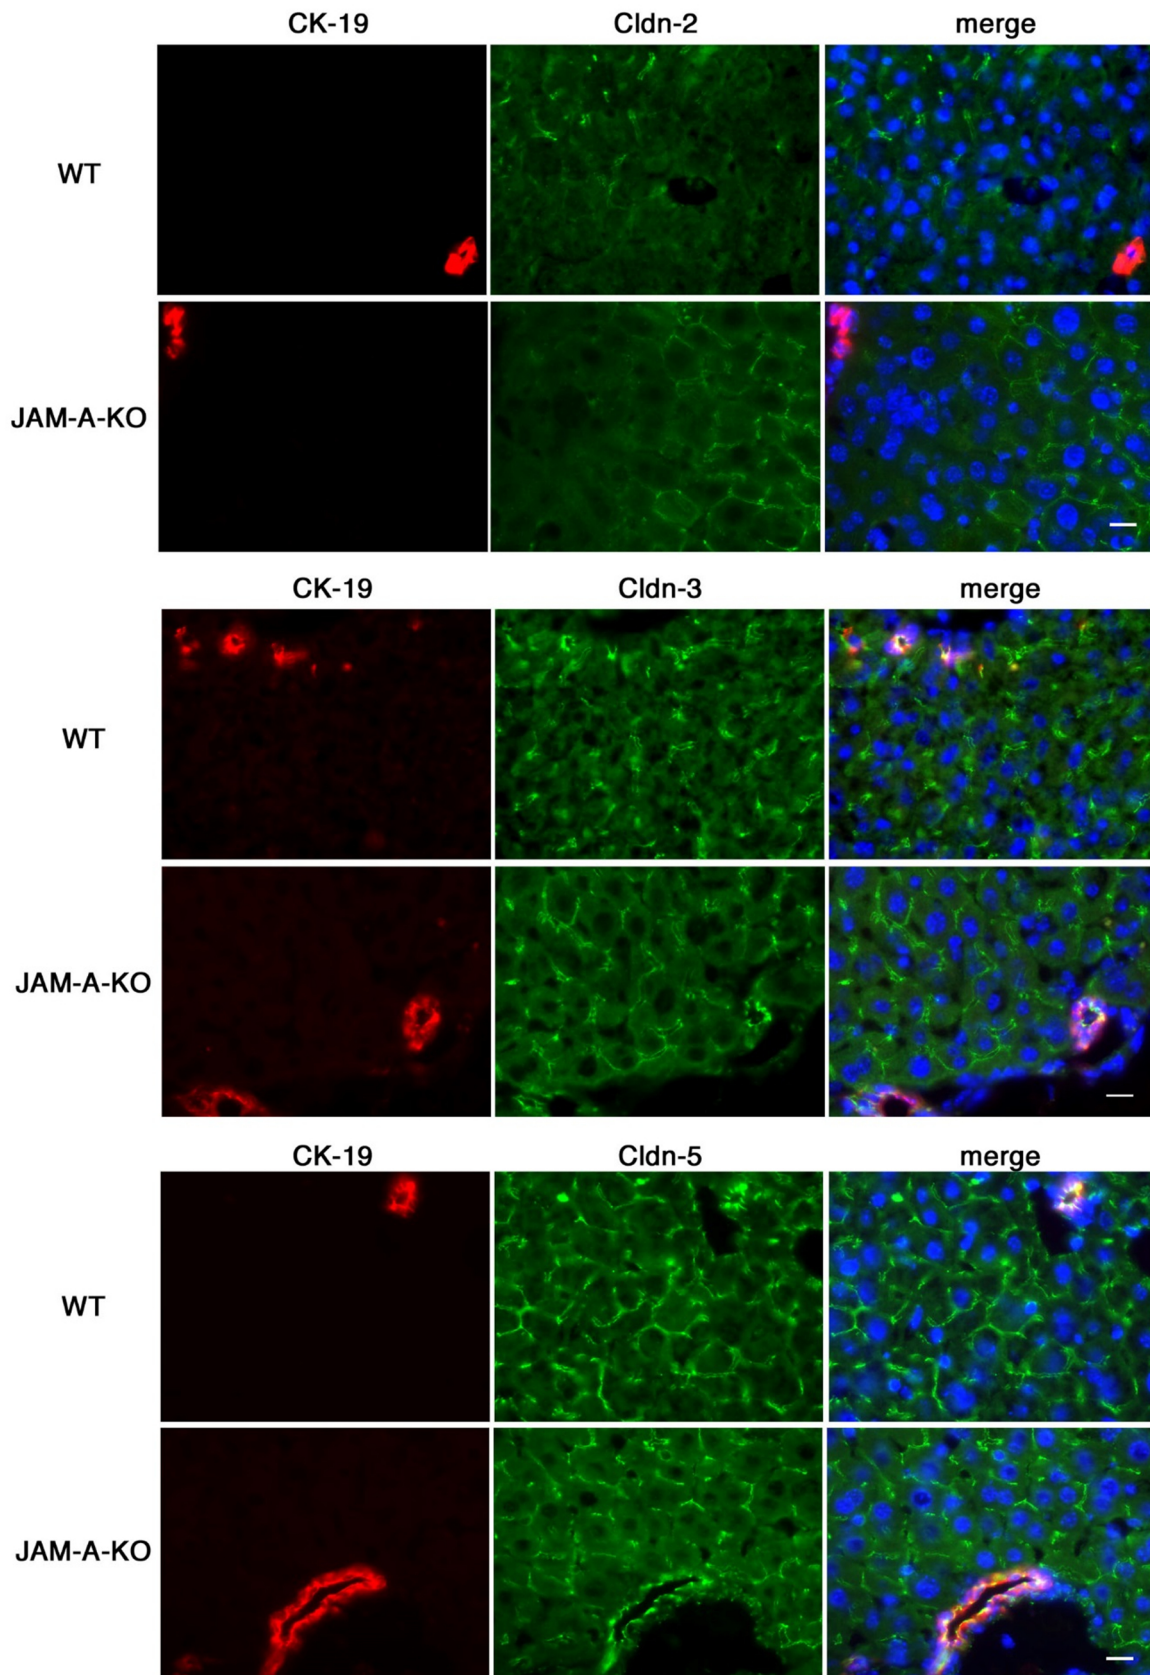

Supplementary Figure 13B

Supplement: inline-supplementary-material-14 [file inline-supplementary-material-14.pdf]

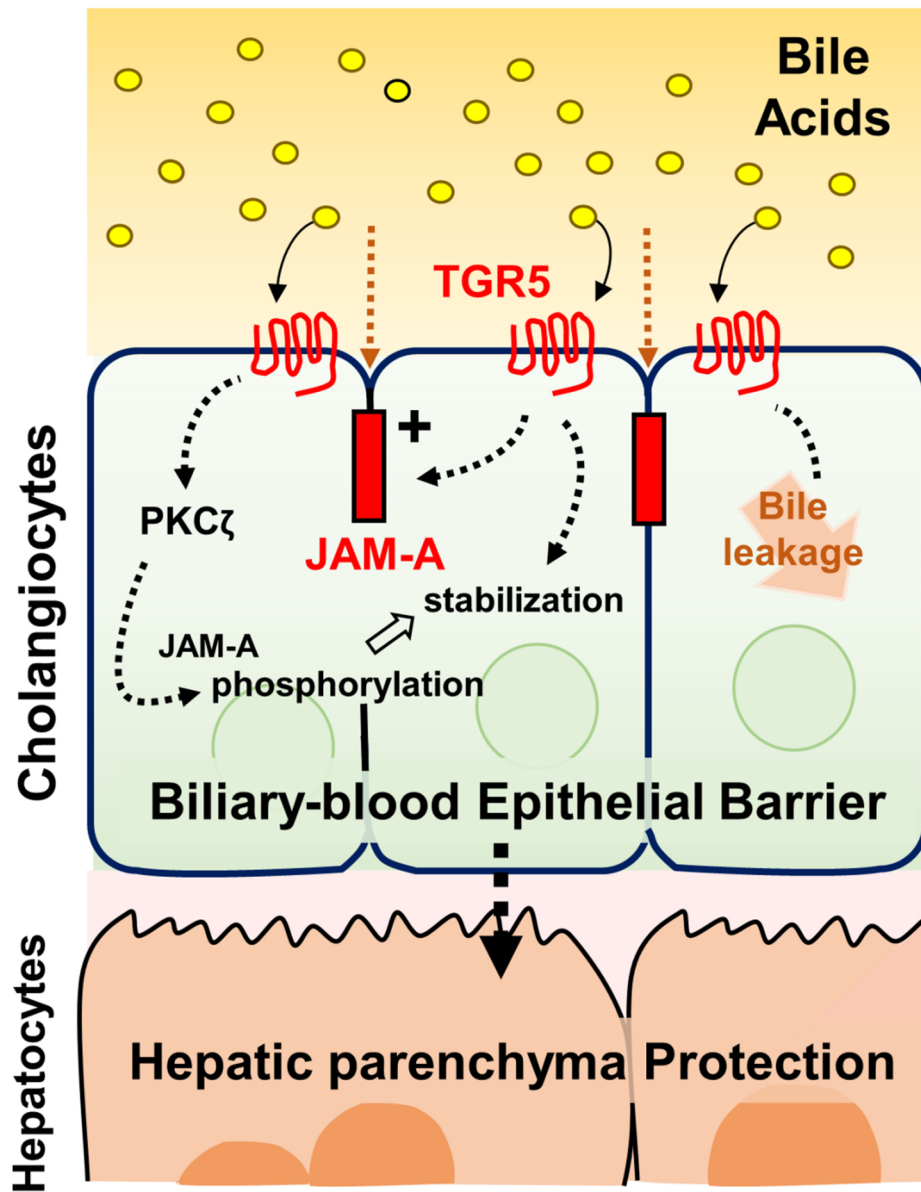

Supplementary Figure 14

Supplement: inline-supplementary-material-15 [file inline-supplementary-material-15.pdf]

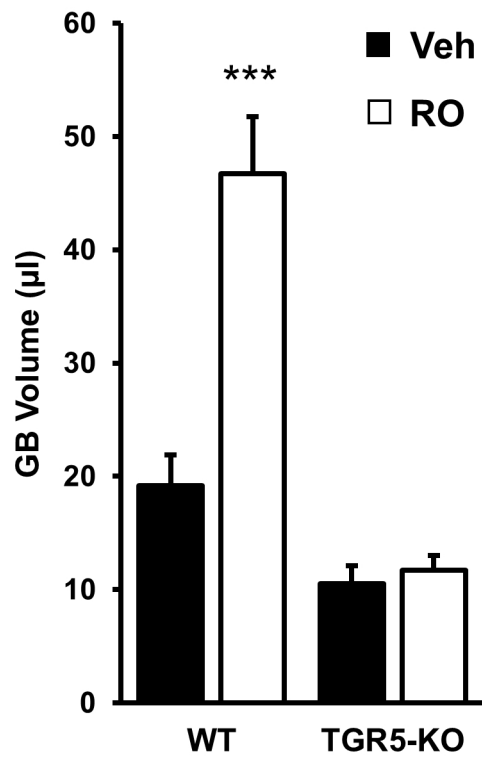

Supplementary Figure 2

Supplement: inline-supplementary-material-3 [file inline-supplementary-material-3.pdf]

**A**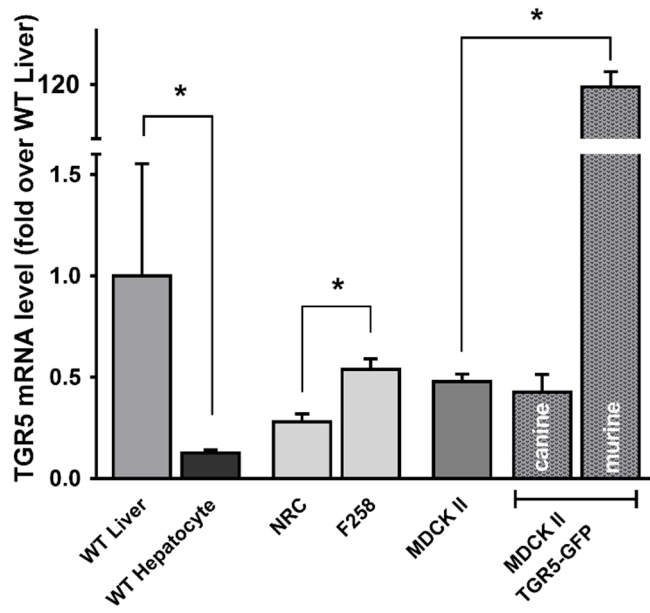**B F258 cells**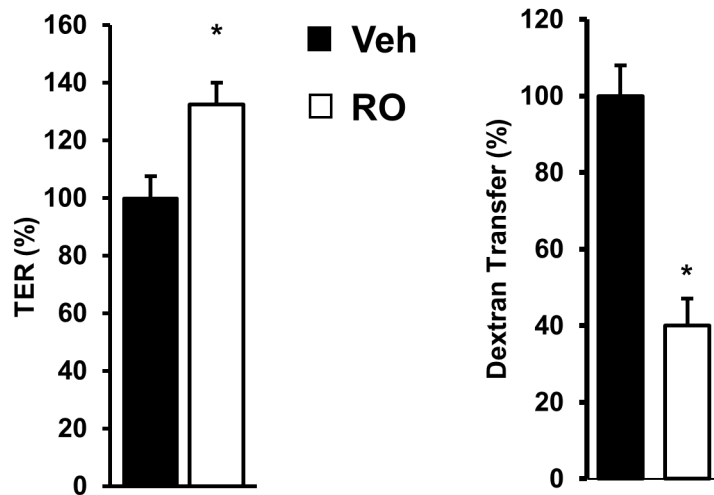**C**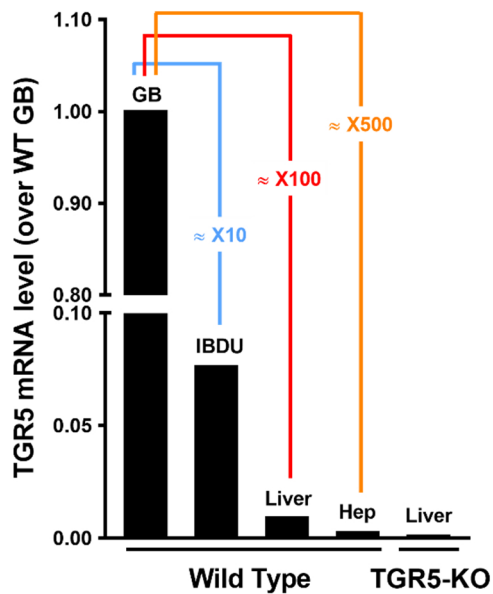

Supplement: inline-supplementary-material-4 [file inline-supplementary-material-4.pdf]

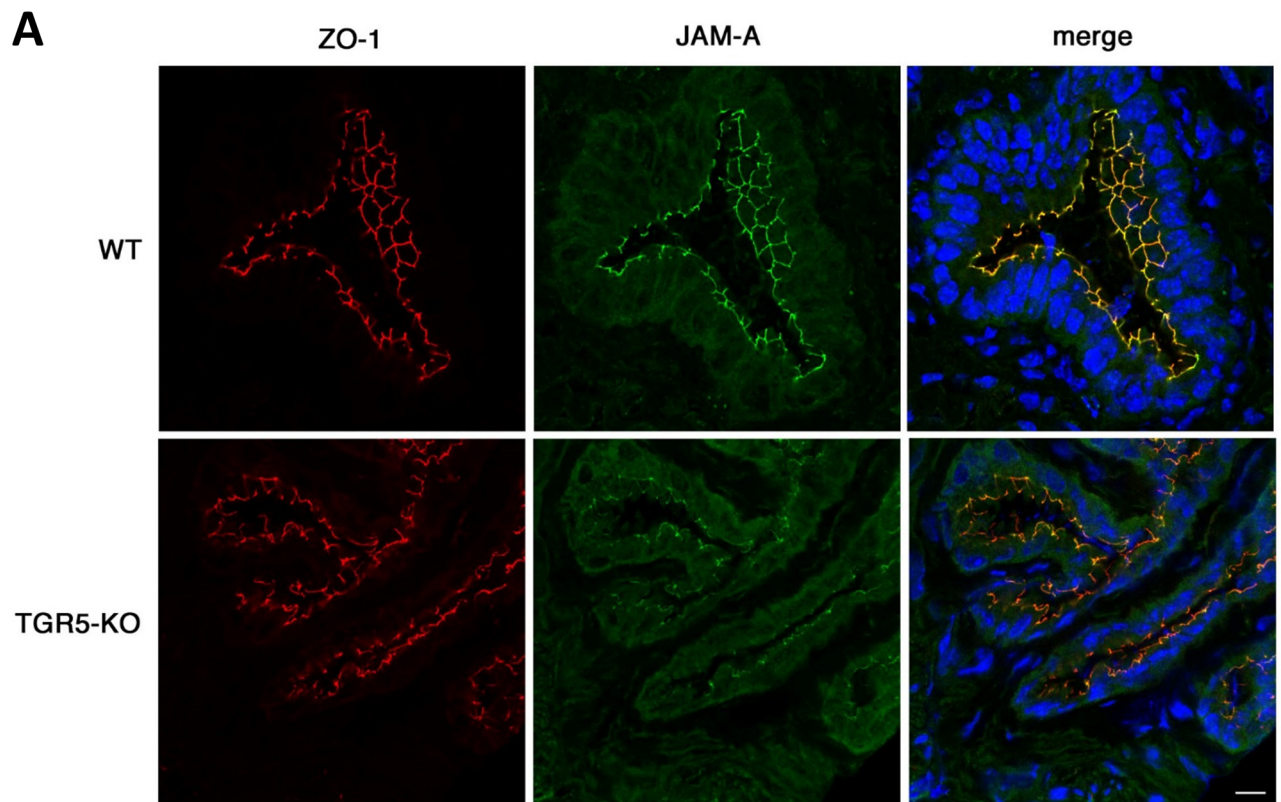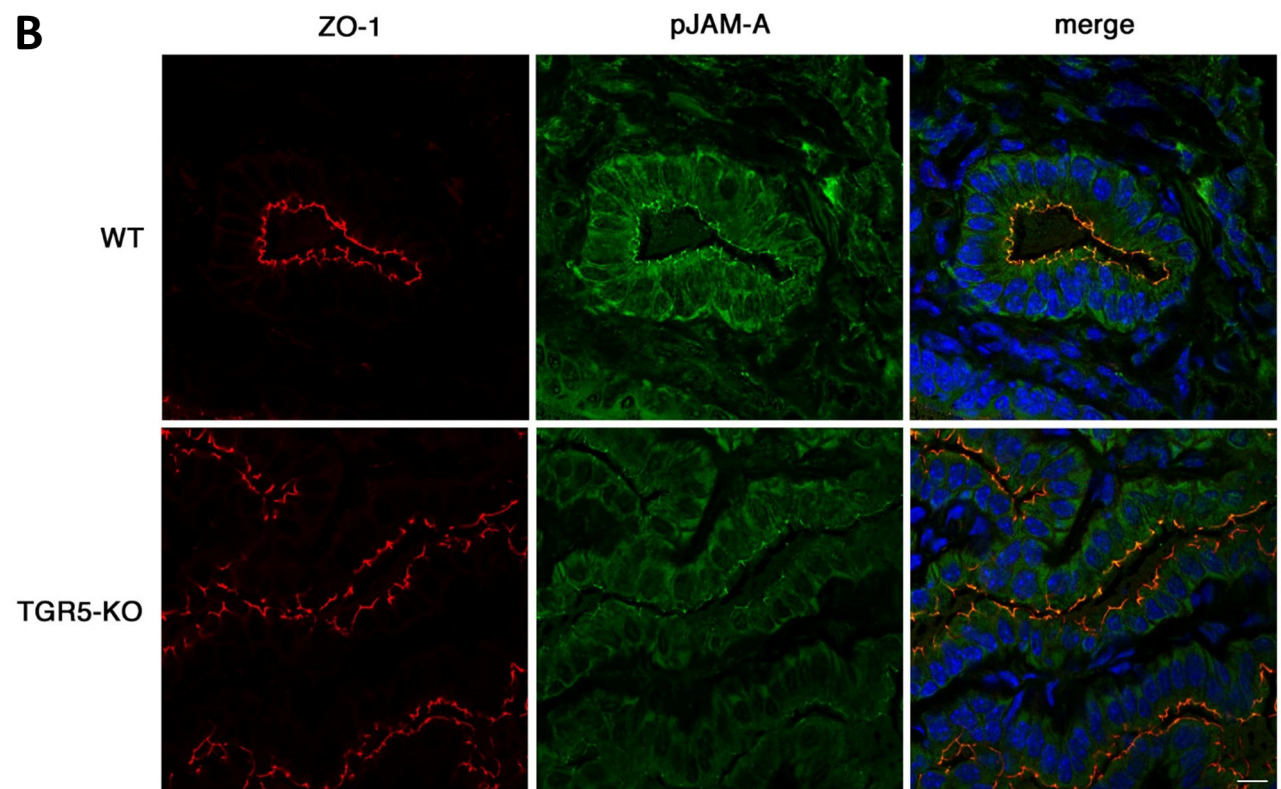

**Supplementary Figure 5**

Supplement: inline-supplementary-material-5 [file inline-supplementary-material-5.pdf]

## A Hepatocyte

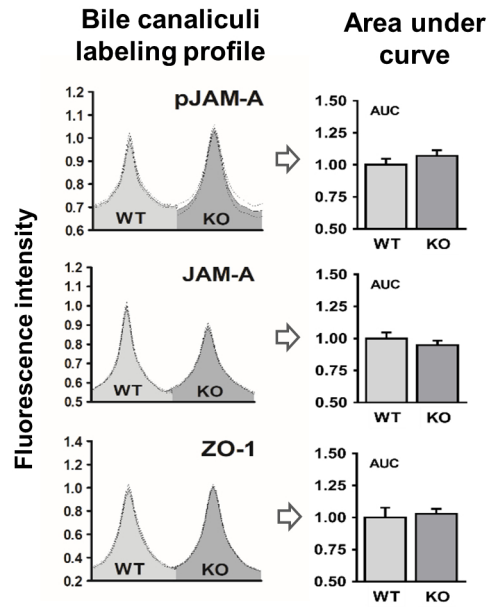

## B Gallbladder

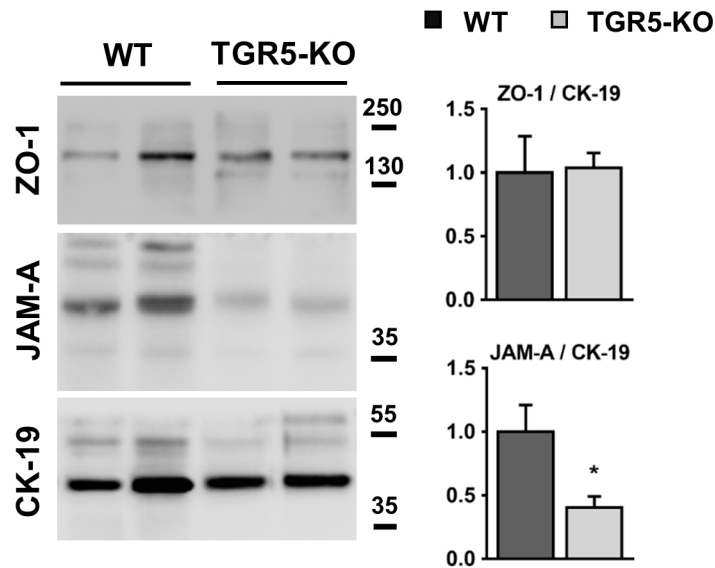

## C Liver

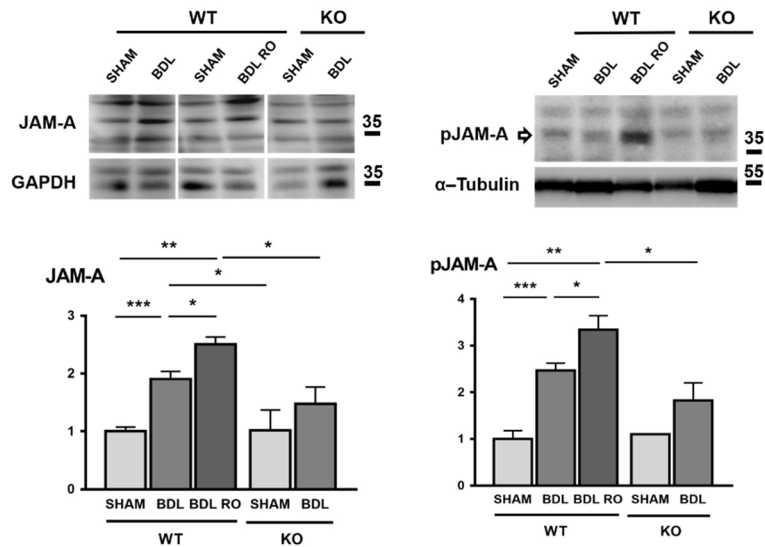

Supplementary Figure 6

Supplement: inline-supplementary-material-7 [file inline-supplementary-material-7.pdf]

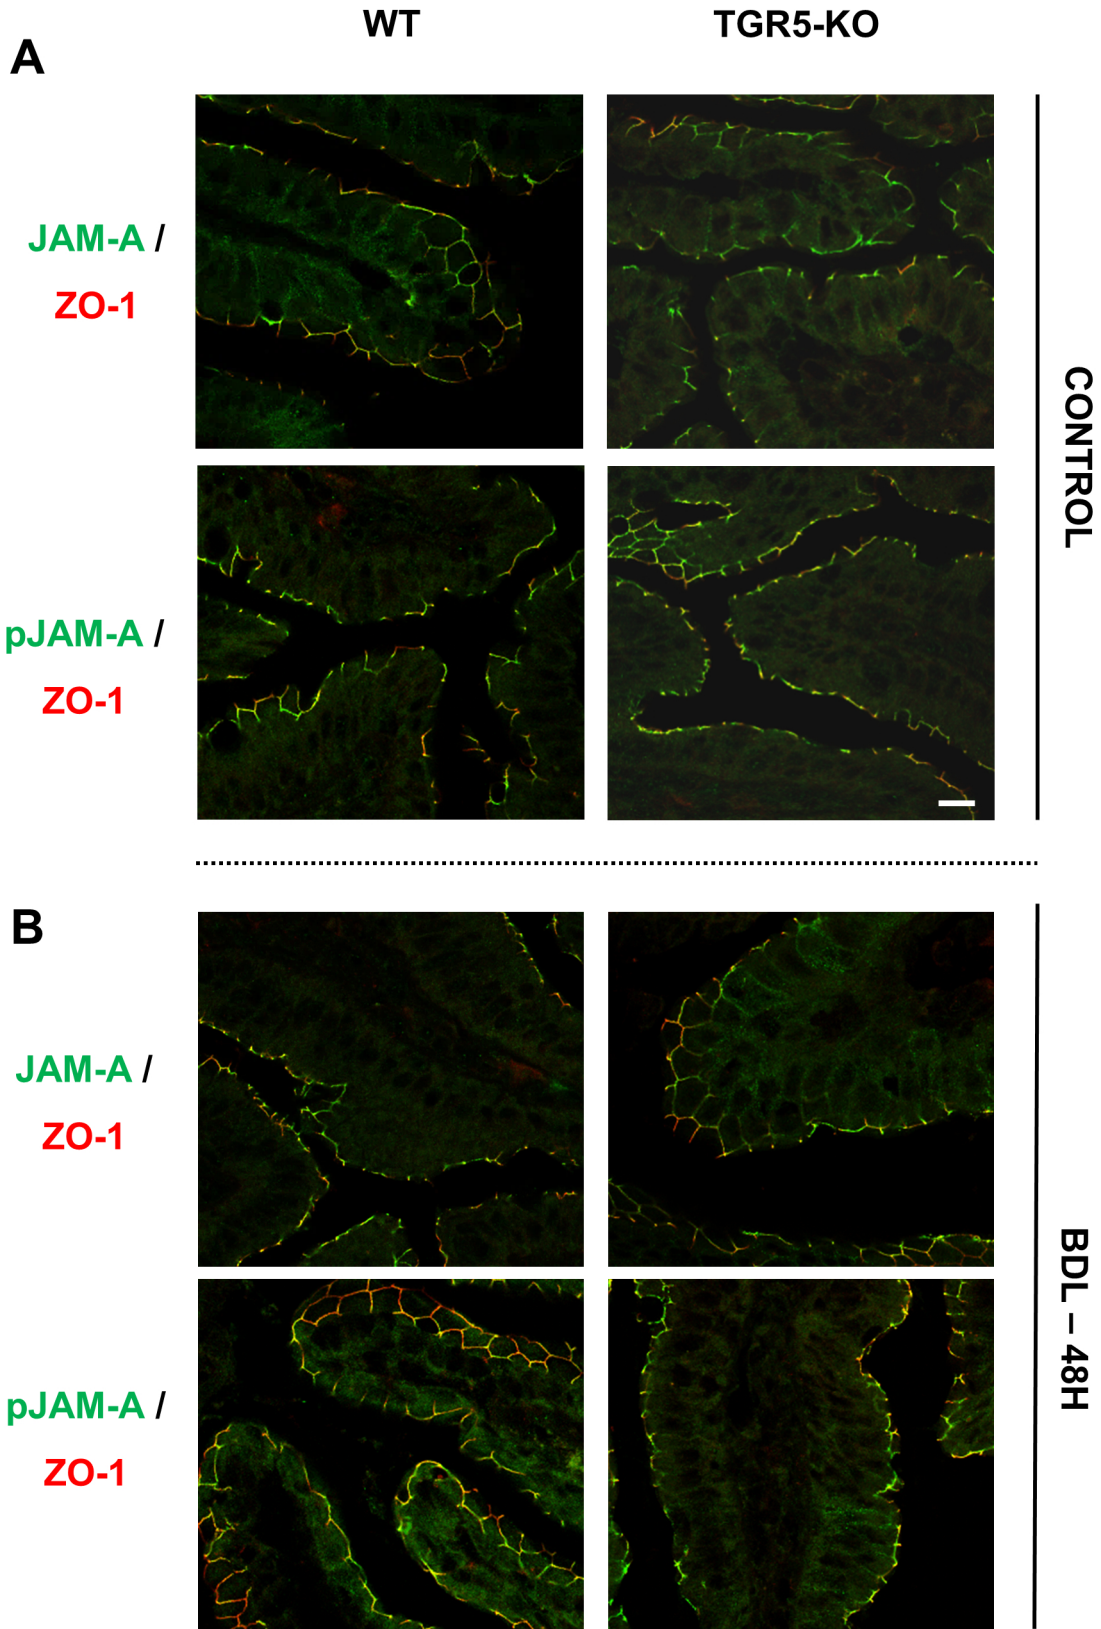

Supplementary Figure 7

Supplement: inline-supplementary-material-8 [file inline-supplementary-material-8.pdf]

## A NRC cells

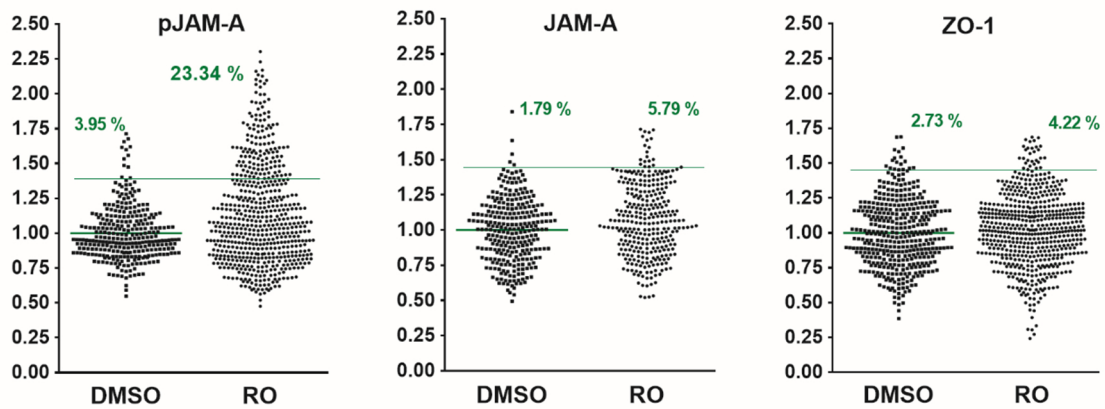

## B F258 cells

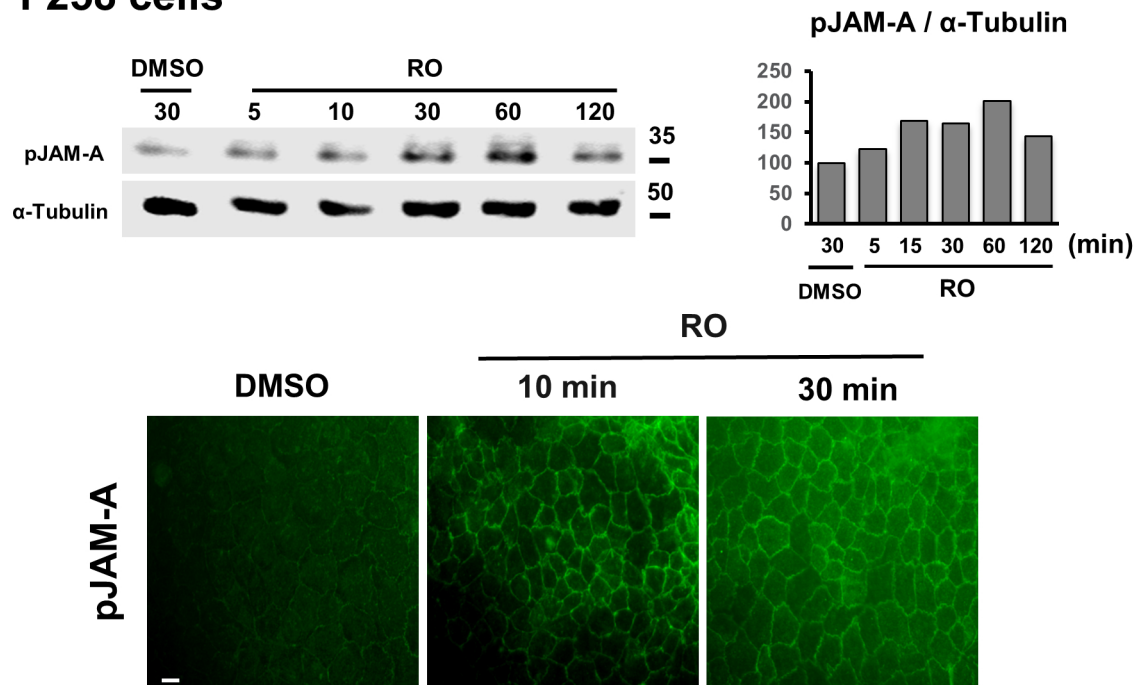

## C Gallbladder

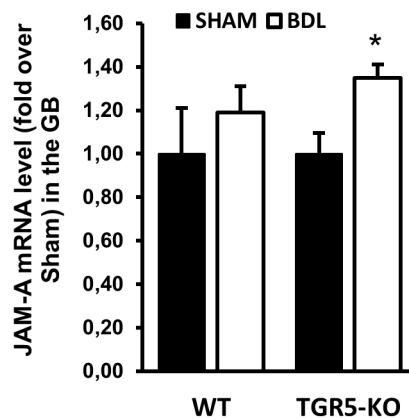

Supplement: inline-supplementary-material-9 [file inline-supplementary-material-9.pdf]
